# Supplementary material
Source: PubMed Central journal article supplement (PMC3607193)
Supplement: 97320630009325S1.pdf [file 97320630009325S1.pdf]

## Supplementary material:

### Scripts:

Configuration File to run PyPLIF (config.txt)

---

| Lines | Script                                                                                                                                                                                                                                                                                                                                                                                                                                                                                                                                     |
|-------|--------------------------------------------------------------------------------------------------------------------------------------------------------------------------------------------------------------------------------------------------------------------------------------------------------------------------------------------------------------------------------------------------------------------------------------------------------------------------------------------------------------------------------------------|
| 1     | protein_reference ER_site.mol2                                                                                                                                                                                                                                                                                                                                                                                                                                                                                                             |
| 2     | ligand_reference OHT.mol2                                                                                                                                                                                                                                                                                                                                                                                                                                                                                                                  |
| 3     |                                                                                                                                                                                                                                                                                                                                                                                                                                                                                                                                            |
| 4     | protein_ligand_folder results                                                                                                                                                                                                                                                                                                                                                                                                                                                                                                              |
| 5     | residue_of_choice LEU327 TYR328 SER329 GLU330 SER341 MET342 MET343 GLY344 LEU345 LEU346 THR347<br>ASN348 LEU349 ALA350 ASP351 ARG352 GLU353 LEU354 VAL355 MET357 LEU379 GLU380 CYS381 ALA382 TRP383<br>LEU384 GLU385 ILE386 LEU387 MET388 ILE389 GLY390 LEU391 VAL392 ARG394 SER395 LEU402 LEU403 PHE404<br>ALA405 LEU408 LEU410 GLY415 VAL418 GLU419 GLY420 MET421 VAL422 GLU423 ILE424 PHE425 LEU428 ILE514<br>HIS516 MET517 SER518 ASN519 LYS520 GLY521 MET522 GLU523 HIS524 LEU525 TYR526 SER527 MET528 LYS529<br>CYS530 LEU536 LEU539 |
| 6     | output_file ../../pyplif_result/ligandER_tc.csv                                                                                                                                                                                                                                                                                                                                                                                                                                                                                            |

---

Shell Script to perform hydrogen bond to the residue ASP351 filtering (tc\_cum\_sorted\_filter\_ASP351.sh):

---

| Lines | Script                                                                                            |
|-------|---------------------------------------------------------------------------------------------------|
| 1     | #!/bin/sh                                                                                         |
| 2     |                                                                                                   |
| 3     | # a script to choose the conformation with best Tc-IFP and score from each ligand                 |
| 4     | # then put them into one file and sort them (all the best ligand conf) by Tc-IFP and score.       |
| 5     | rm tc_all.csv                                                                                     |
| 6     | for i in \$(cat ligand.lst)                                                                       |
| 7     | do                                                                                                |
| 8     | best=`awk '{if (substr(\$4,103,1)==1) print \$0}' pyplif_result/\${i}_tc.csv   sort -n -k3rn -k2n |
| 9     | head -n1`                                                                                         |
|       | # to check which csv is missing                                                                   |
| 10    | if [ -z "\$best" ]; then                                                                          |
| 11    | echo \$i                                                                                          |
| 12    | fi                                                                                                |
| 13    | echo \$best >> tc_all.csv                                                                         |
| 14    | done                                                                                              |
| 15    |                                                                                                   |
| 16    | sort -n -k3rn -k2n tc_all.csv > tc_all_sorted.csv                                                 |

---
